# Supplementary material for: WTAP Is Correlated With Unfavorable Prognosis, Tumor Cell Proliferation, and Immune Infiltration in Hepatocellular Carcinoma
Source: Frontiers journal article supplement (doi:10.3389/fonc.2022.852000), 2022-04-11
Supplement: Data_Sheet_1.ZIP [file Data_Sheet_1.ZIP]

|                                                                                   |                                                                                                                                                                                       |        |                                                                                                                        |            |
|-----------------------------------------------------------------------------------|---------------------------------------------------------------------------------------------------------------------------------------------------------------------------------------|--------|------------------------------------------------------------------------------------------------------------------------|------------|
|  | <b>上海芯超生物科技有限公司</b><br>Shanghai Outdo Biotech Company                                                                                                                                 |        | Barcode                                                                                                                |            |
|                                                                                   | 伦理委员会审核意见书                                                                                                                                                                            |        | 编号/Ctl No.                                                                                                             | YB M-05-02 |
|                                                                                   |                                                                                                                                                                                       |        | 版本/Version                                                                                                             | 1.0        |
| 项目名称                                                                              | 肝癌组织芯片产品开发及应用                                                                                                                                                                         |        |                                                                                                                        |            |
| 项目来源                                                                              | 上海芯超生物科技有限公司                                                                                                                                                                          | 项目承担单位 | 上海芯超生物科技有限公司                                                                                                           |            |
| 项目编号                                                                              | HLivH180Su18                                                                                                                                                                          | 项目负责人  | 朱诗樟                                                                                                                    |            |
| 审核结果                                                                              | 参加伦理委员会会议 <u>7</u> 人，投票结果：<br><br>A) 同意 <u>7</u> 票<br>B) 修正后再审查 <u>      </u> 票<br>C) 不同意 <u>      </u> 票<br>D) 暂停或终止 <u>      </u> 票<br><br>伦理委员会审查意见：<br><br>申报内容经审查，符合作理要求，同意通过审查。 |        |                                                                                                                        |            |
|                                                                                   | 记录人签名：<br><br><br>2018年 1 月 8 日                                                                    |        | 主任委员签名：<br>(伦理委员会盖章)<br><br>年 月 日 |            |

保存期限：长期

|                                                                                                                   |                                                                                                                                                               |                                                                                                                                   |                   |            |
|-------------------------------------------------------------------------------------------------------------------|---------------------------------------------------------------------------------------------------------------------------------------------------------------|-----------------------------------------------------------------------------------------------------------------------------------|-------------------|------------|
|                                  | <b>上海芯超生物科技有限公司</b><br>Shanghai Outdo Biotech Company                                                                                                         |                                                                                                                                   | Barcode           |            |
|                                                                                                                   | <b>样本使用伦理审查申请表</b>                                                                                                                                            |                                                                                                                                   | 编号/Ctl No.        | YB M-05-01 |
|                                                                                                                   |                                                                                                                                                               |                                                                                                                                   | 版本/Version        | 1.0        |
| 项目名称:                                                                                                             | 肝癌组织芯片产品开发及应用                                                                                                                                                 | 项目编号:                                                                                                                             | HLivH180Su18      |            |
| 项目来源:                                                                                                             | 上海芯超生物科技有限公司                                                                                                                                                  | 资金来源:                                                                                                                             | 上海芯超生物科技有限公司      |            |
| 样本名称:                                                                                                             | 肝癌石蜡样本                                                                                                                                                        | 样本数量:                                                                                                                             | 癌 90 例/癌旁 90 例    |            |
| 申请人:                                                                                                              | 沈晓静                                                                                                                                                           | 联系方式:                                                                                                                             | 021-51320288-5219 |            |
| 研究者 1:                                                                                                            | 高校、医院、研究所                                                                                                                                                     | 研究者 2:                                                                                                                            | 企业及其他研发机构         |            |
| 项目承担单位:                                                                                                           | 上海芯超生物科技有限公司                                                                                                                                                  |                                                                                                                                   |                   |            |
| 项目负责人:                                                                                                            | 朱诗樟                                                                                                                                                           | 联系方式:                                                                                                                             | 021-51320288-5219 |            |
| 拟研究时间:                                                                                                            | 2018 年 1 月 5 日 至 2019 年 12 月 31 日                                                                                                                             |                                                                                                                                   |                   |            |
| 一、请阐述该样本用于研究的描述（包括目标和假设）：<br><br>生存期肝癌细胞癌 90 例——癌/癌旁各 1 点。手术时间 2010.1—2011.9，随访时间 2013.9。随访 2—3.7 年。              |                                                                                                                                                               |                                                                                                                                   |                   |            |
| 二、项目研究的方法：<br><br>免疫组化、原位杂交、原位 PCR 等分子病理学实验                                                                       |                                                                                                                                                               |                                                                                                                                   |                   |            |
| 备注                                                                                                                |                                                                                                                                                               |                                                                                                                                   |                   |            |
|                                                                                                                   | 申报部门意见：<br><br><div style="text-align: right;">部门负责人签（章）： </div>         |                                                                                                                                   |                   |            |
| 说明                                                                                                                | 为有效利用宝贵的样本资源，您需向样本库提供一份简要的研究设计（如上）和所要求的资料，您要保证您将合法地使用样本，并进行您的上述研究，您需承诺在您的研究成果和文章上注明样本来源于：<br>上海芯超·生物样本库<br><br>申请程序：下载申请表----填写申请表----负责人签字（盖章）----样本库伦理委员会审核 |                                                                                                                                   |                   |            |
| 申请人：<br><br><br>2018 年 1 月 5 日 |                                                                                                                                                               | 样本库审核意见：<br><br>样本库负责人签字： <br>2018 年 1 月 5 日 |                   |            |

保存期限：长期
